# Supplementary material for: Gene expression profile of human colorectal cancer identified NKTR as a biomarker for liver metastasis
Source: publisher site journal article supplement (doi:10.18632/aging.204242), 2022-08-23
Supplement: Supplementary file [file aging-v14i16-204242-supplementary-material-SD1.pdf]

**SUPPLEMENTARY FIGURE**

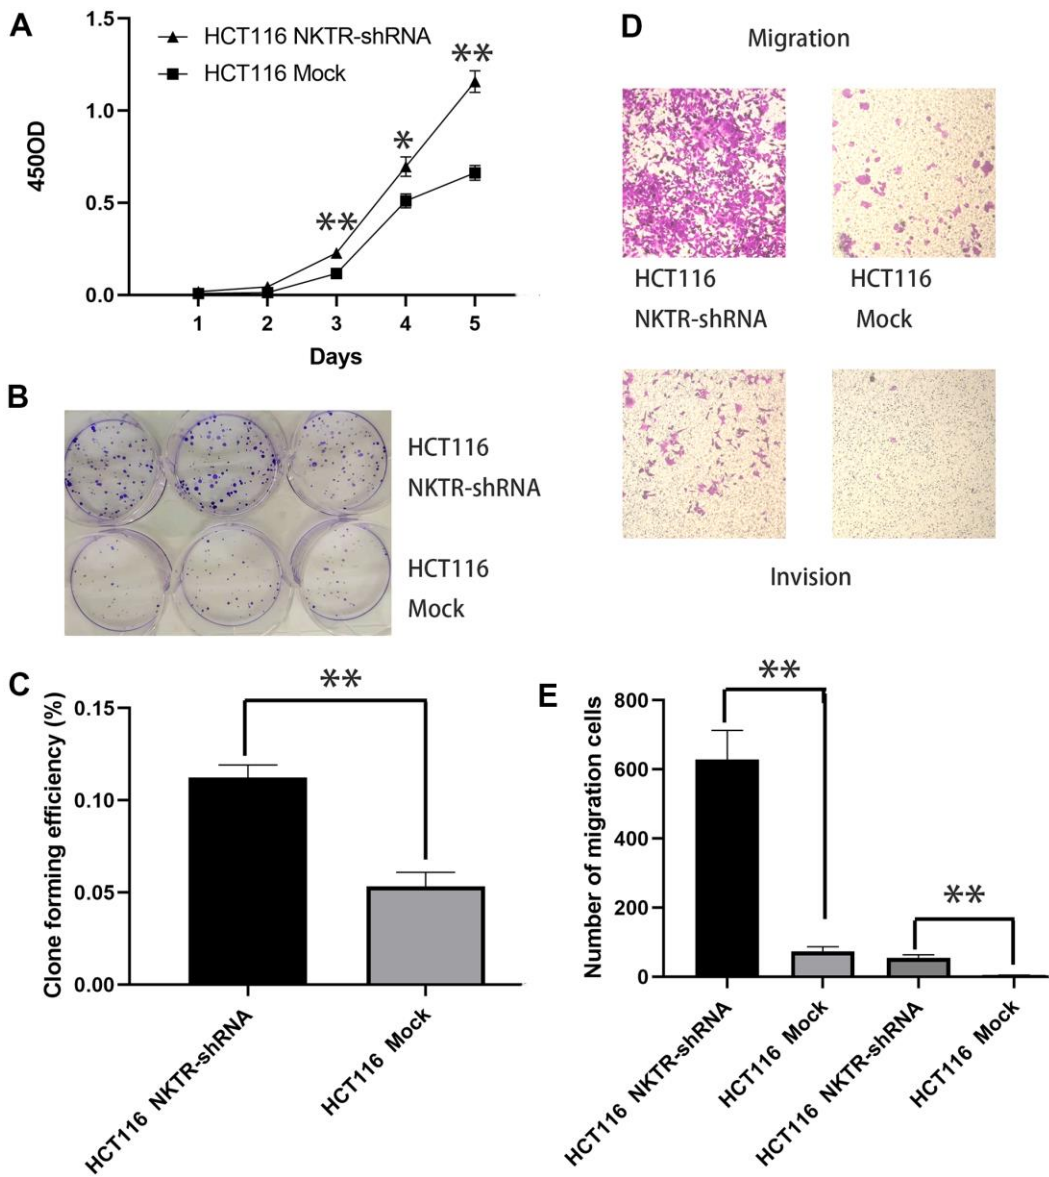

**Supplementary Figure 1.** (A) Effect of NKTR expression of HCT116 cell proliferation. Error bars indicate s.e.m., n = 3. \*P < 0.05, \*\*P < 0.01 (Student's *t*-test). (B, C) Effect of NKTR expression on HCT116 cell colony formation. Error bars indicate s.e.m., n = 3. \*\*P < 0.05 (Student's *t*-test). (D, E) Effect of NKTR expression on HCT116 cell migration and invasion. Data are representative of each group or expressed as the mean ± s.e.m. of cells per six high power fields. \*P < 0.05 (Student's *t*-test).
