# Supplementary material for: Gene expression profile of human colorectal cancer identified NKTR as a biomarker for liver metastasis
Source: Aging (Albany NY). 2022 Aug 23;14(16):6656–67. doi: 10.18632/aging.204242 (PMC9467399; doi:10.18632/aging.204242)
Supplement: Supplementary Table 2 [file aging-14-204242-s003.xls]

## Sheet: Sheet1
Supplementary Table 2. SAM analysis results.
	up-regulated genes					down-regulated genes
probe	gene	uni gene	fold change		probe	gene	uni gene	fold change
1552306_at	ALG10	Hs.102971	1.94004		201340_s_at	ENC1	Hs.104925	0.575025
206125_s_at	KLK8	Hs.104570	2.97015		1556183_at	FLJ40330	Hs.105323	0.49465
209723_at	SERPINB9	Hs.104879	1.67932		222722_at	OGN	Hs.109439	0.50807
232591_s_at	TMEM30A	Hs.108530	1.54252		205839_s_at	BZRAP1	Hs.112499	0.643379
218701_at	LACTB2	Hs.118554	1.59786		213894_at	THSD7A	Hs.120855	0.574094
205108_s_at	APOB	Hs.120759	1.99923		229400_at	HOXD10	Hs.123070	0.370419
214469_at	HIST1H2AE	Hs.121017	1.55782		228173_at	GNAS	Hs.125898	0.57041
206726_at	HPGDS	Hs.128433	1.54941		208835_s_at	CROP	Hs.130293	0.561929
211406_at	IER3IP1	Hs.130917	1.58738		206792_x_at	PDE4C	Hs.132584	0.65702
226809_at	LOC100216479	Hs.131740	1.64581		225660_at	SEMA6A	Hs.156967	0.592476
238335_at	DNAJC21	Hs.131887	1.51607		209540_at	IGF1	Hs.160562	0.375984
229905_at	RAP1GDS1	Hs.132858	1.66601		214598_at	CLDN8	Hs.162209	0.213864
215465_at	ABCA12	Hs.134585	1.54137		206143_at	SLC26A3	Hs.1650	0.523472
219232_s_at	EGLN3	Hs.135507	2.42716		203146_s_at	GABBR1	Hs.167017	0.581966
201849_at	BNIP3	Hs.144873	2.13327		222310_at	SFRS15	Hs.17255	0.628088
212094_at	PEG10	Hs.147492	3.59419		233868_x_at	ADAM33	Hs.173716	0.629448
228153_at	RNF144B	Hs.148741	1.51189		208798_x_at	GOLGA8A	Hs.182982	0.544348
217188_s_at	C14orf1	Hs.15106	1.5354		214707_x_at	ALMS1	Hs.184720	0.655123
218025_s_at	PECI	Hs.15250	1.5086		230885_at	SPG7	Hs.185597	0.625034
1553994_at	NT5E	Hs.153952	1.7619		229584_at	LRRK2	Hs.187636	0.618497
231513_at	KCNJ2	Hs.1547	1.65112		202102_s_at	BRD4	Hs.187763	0.624032
227602_at	RAB7A	Hs.15738	1.71761		230389_at	FNBP1	Hs.189409	0.651055
227535_at	C15orf24	Hs.160565	1.55115		236254_at	VPS13B	Hs.191540	0.629977
242271_at	SLC26A9	Hs.164073	3.10139		1558467_a_at	UGGT2	Hs.193226	0.634492
205891_at	ADORA2B	Hs.167046	1.82418		230000_at	RNF213	Hs.195642	0.607862
205016_at	TGFA	Hs.170009	1.5007		235879_at	MBNL1	Hs.201858	0.580068
216985_s_at	STX3	Hs.180711	1.50459		241140_at	LMO7	Hs.207631	0.591554
230265_at	SEL1L	Hs.181300	2.0664		235301_at	KIAA1324L	Hs.208093	0.638305
208490_x_at	HIST1H2BF	Hs.182137	1.67512		232597_x_at	SFRS2IP	Hs.210367	0.628573
223723_at	MFI2	Hs.184727	1.61013		202037_s_at	SFRP1	Hs.213424	0.205998
1553991_s_at	VSIG10	Hs.187624	1.54731		214594_x_at	ATP8B1	Hs.216623	0.657421
214008_at	TWF1	Hs.189075	1.79413		204537_s_at	GABRE	Hs.22785	0.623585
229671_s_at	C21orf45	Hs.190518	1.68247		205950_s_at	CA1	Hs.23118	0.312378
1565823_at	C41159	Hs.191346	1.5755		238736_at	REV3L	Hs.232021	0.606056
216685_s_at	MTAP1	Hs.193267	1.80018		232266_x_at	CDK13	Hs.233552	0.59787
211363_s_at	MTAP	Hs.193268	2.02074		218312_s_at	ZSCAN18	Hs.235390	0.657731
230206_at	DOCK5	Hs.195403	1.64733		234762_x_at	NLN	Hs.247460	0.657789
225836_s_at	C12orf32	Hs.198853	1.63908		226783_at	AGXT2L2	Hs.248746	0.656709
232164_s_at	EPPK1	Hs.200412	1.67513		211116_at	SLC9A2	Hs.250083	0.634068
216899_s_at	SKAP2	Hs.200770	1.50048		228506_at	NSMCE4A	Hs.258798	0.578267
242560_at	FANCD2	Hs.208388	1.6098		209006_s_at	C1orf63	Hs.259412	0.589092
223949_at	TMPRSS3	Hs.208600	2.45427		234331_s_at	FAM84A	Hs.260855	0.664318
1554241_at	COCH	Hs.21016	1.62426		220335_x_at	CES3	Hs.268700	0.640112
204496_at	STRN3	Hs.21016	1.50805		214132_at	ATP5C1	Hs.271135	0.587292
203323_at	CAV2	Hs.212332	2.03865		220834_at	MS4A12	Hs.272789	0.504157
227801_at	TRIM59	Hs.212957	1.60243		201427_s_at	SEPP1	Hs.275775	0.572304
223661_at	NUCKS1	Hs.213061	1.68023		216979_at	NR4A3	Hs.279522	0.605954
204807_at	TMEM5	Hs.216386	1.51873		215600_x_at	FBXW12	Hs.288793	0.659132
202708_s_at	HIST2H2BE	Hs.2178	1.83512		204150_at	STAB1	Hs.301989	0.623504
235244_at	CCDC58	Hs.220594	1.50383		224963_at	SLC26A2	Hs.302738	0.374773
229120_s_at	CDC42SE1	Hs.22065	1.6425		242268_at	CELF2	Hs.309288	0.630388
228634_s_at	CSDA	Hs.221889	1.65063		229981_at	SNX5	Hs.316890	0.63608
219298_at	ECHDC3	Hs.22242	2.26766		1553349_at	ARID2	Hs.317304	0.625153
227403_at	PIGX	Hs.223296	1.68307		242918_at	NASP	Hs.319334	0.546533
219196_at	SCG3	Hs.232618	2.7482		1561615_s_at	SLC8A1	Hs.31961	0.578013
203626_s_at	SKP2	Hs.23348	1.65476		243109_at	MCTP2	Hs.33368	0.489358
226021_at	RDH10	Hs.244940	1.7321		1561079_at	ANKRD28	Hs.335239	0.581931
208546_x_at	HIST1H2BH	Hs.247815	1.74781		209821_at	IL33	Hs.348390	0.553031
235591_at	SSTR1	Hs.248160	1.75161		1558515_at	NCRNA00182	Hs.349570	0.61917
231798_at	NOG	Hs.248201	1.55387		218750_at	TAF1D	Hs.355750	0.569066
236249_at	IKBIP	Hs.252543	1.66535		221768_at	SFPQ	Hs.355934	0.487925
228432_at	RAB3IP	Hs.258209	1.67733		229899_s_at	C20orf199	Hs.356766	0.559901
244110_at	MLL	Hs.258855	1.50202		230424_at	C5orf13	Hs.36053	0.659432
212398_at	RDX	Hs.263671	1.83125		204345_at	COL16A1	Hs.368921	0.563767
226220_at	METTL9	Hs.279583	1.53149		221690_s_at	NLRP2	Hs.369279	0.520111
213409_s_at	RHEB	Hs.283521	1.55368		225762_x_at	LOC284801	Hs.370699	0.615435
223481_s_at	MRPL47	Hs.283734	1.96509		208003_s_at	NFAT5	Hs.371987	0.605842
228530_at	C13orf37	Hs.28465	2.0077		242438_at	ASXL1	Hs.374043	0.653845
205406_s_at	SPA17	Hs.286233	1.58474		229966_at	EWSR1	Hs.374477	0.611601
233814_at	EFNA5	Hs.288741	2.02109		1555920_at	CBX3	Hs.381189	0.575534
213582_at	ATP11A	Hs.29189	1.61163		239629_at	CFLAR	Hs.390736	0.547928
221258_s_at	KIF18A	Hs.301052	1.5007		227891_s_at	TAF15	Hs.402752	0.652069
213536_s_at	UBE2I	Hs.302903	1.64944		230624_at	SLC25A27	Hs.40510	0.612853
216519_s_at	PROSC	Hs.304792	1.78206		209240_at	OGT	Hs.405410	0.64029
220549_at	RAD54B	Hs.30561	1.50479		210084_x_at	TPSAB1	Hs.405479	0.559464
203434_s_at	MME	Hs.307734	2.07127		243496_at	RAB18	Hs.406799	0.597154
221917_s_at	GRSF1	Hs.309763	1.621		225786_at	NCRNA00201	Hs.411490	0.53602
1568574_x_at	SPP1	Hs.313	2.37942		228793_at	JMJD1C	Hs.413416	0.626984
228338_at	C11orf93	Hs.31409	1.97158		231647_s_at	FCRL5	Hs.415950	0.382439
210596_at	MAGT1	Hs.323562	1.6783		228235_at	MGC16121	Hs.416379	0.634868
222562_s_at	TNKS2	Hs.329327	1.51638		209942_x_at	MAGEA3	Hs.417816	0.0298013
1559584_a_at	C16orf54	Hs.331095	3.05818		222540_s_at	RSF1	Hs.420229	0.647785
242037_at	ASPH	Hs.332422	1.66799		1556126_s_at	GPATCH2	Hs.420757	0.661006
231534_at	CDK1	Hs.334562	1.67893		213353_at	ABCA5	Hs.421474	0.642457
202263_at	CYB5R1	Hs.334832	1.51303		215978_x_at	ZNF721	Hs.428360	0.64331
212009_s_at	STIP1	Hs.337295	1.92564		235444_at	FOXP1	Hs.431498	0.649133
205234_at	SLC16A4	Hs.351306	1.76734		208610_s_at	SRRM2	Hs.433343	0.607156
215034_s_at	TM4SF1	Hs.351316	1.5515		213106_at	ATP8A1	Hs.435052	0.655834
223292_s_at	MRPS15	Hs.352839	1.5709		228455_at	RBM15	Hs.435947	0.662047
227862_at	TRNP1	Hs.355747	2.06789		228393_s_at	ZNF302	Hs.436350	0.664695
208050_s_at	CASP2	Hs.368982	1.71053		232489_at	CCDC76	Hs.440371	0.619284
1555355_a_at	ETS1	Hs.369438	1.68658		212629_s_at	PKN2	Hs.440833	0.627884
218264_at	BCCIP	Hs.370292	1.50155		214612_x_at	MAGEA6	Hs.441113	0.0409438
235309_at	RPS15A	Hs.370504	1.51901		232458_at	COL3A1	Hs.443625	0.338249
242447_at	C3orf70	Hs.380048	1.76276		1557553_at	PPP1R12B	Hs.444403	0.613121
227953_at	CMTM6	Hs.380627	1.69942		231697_s_at	TMEM49	Hs.444569	0.611933
235572_at	SPC24	Hs.381225	1.56127		227152_at	C12orf35	Hs.445129	0.630936
220690_s_at	DHRS7B	Hs.386989	1.88154		228528_at	LOC100286909	Hs.445414	0.518448
243444_at	SRD5A3	Hs.39311	1.63292		215588_x_at	RIOK3	Hs.445511	0.658052
205822_s_at	HMGCS1	Hs.397729	1.76351		201294_s_at	WSB1	Hs.446017	0.617468
201468_s_at	NQO1	Hs.406515	1.67467		214043_at	PTPRD	Hs.446083	0.35898
222853_at	FLRT3	Hs.41296	2.19848		226388_at	TCEA3	Hs.446354	0.612777
1567457_at	RAC1	Hs.413812	1.57897		212187_x_at	PTGDS	Hs.446429	0.553169
233949_s_at	MYH7B	Hs.414122	1.85785		234764_x_at	IGLV1-44	Hs.449585	0.461698
216714_at	CCL13	Hs.414629	1.66289		237625_s_at	IGKC	Hs.449621	0.513945
216607_s_at	CYP51A1	Hs.417077	1.63454		1555938_x_at	VIM	Hs.455493	0.603136
205278_at	GAD1	Hs.420036	2.22193		201508_at	IGFBP4	Hs.462998	0.63596
204110_at	HNMT	Hs.42151	1.54366		220720_x_at	FAM128B	Hs.469925	0.661555
223586_at	ARNTL2	Hs.434269	1.6294		231873_at	BMPR2	Hs.471119	0.658499
202457_s_at	PPP3CA	Hs.435512	1.51249		232500_at	RALGAPA2	Hs.472285	0.591608
214161_at	OSGIN2	Hs.436445	1.52156		1563497_at	USP25	Hs.473370	0.638276
230102_at	ETV5	Hs.43697	1.68452		213359_at	HNRNPD	Hs.480073	0.621371
209806_at	HIST1H2BK	Hs.437275	1.83395		205518_s_at	CMAH	Hs.484918	0.535208
218182_s_at	CLDN1	Hs.439060	1.95293		1555827_at	CCNL1	Hs.4859	0.630161
201559_s_at	CLIC4	Hs.440544	1.50939		229748_x_at	LOC100132288	Hs.487562	0.639189
222051_s_at	E2F5	Hs.445758	1.9552		225107_at	HNRNP	Hs.487774	0.57678
219104_at	RNF141	Hs.44685	1.52785		235643_at	SAMD9L	Hs.489118	0.580091
201130_s_at	CDH1	Hs.461086	1.58656		229218_at	COL1A2	Hs.489142	0.582473
227382_at	CYB5B	Hs.461131	1.50702		243296_at	NAMPT	Hs.489615	0.498477
209378_s_at	FAM190B	Hs.461988	1.57785		201615_x_at	CALD1	Hs.490203	0.499763
216962_at	RPAIN	Hs.462086	1.63871		236561_at	TGFBR1	Hs.494622	0.603304
202691_at	SNRPD1	Hs.464734	1.50345		226344_at	ZMAT1	Hs.496512	0.479987
213999_at	YIPF4	Hs.468099	1.75918		210072_at	CCL19	Hs.50002	0.332051
1552797_s_at	PROM2	Hs.469313	2.71167		1556035_s_at	ZNF207	Hs.500775	0.52044
228638_at	FAM76A	Hs.469359	1.78611		224673_at	LENG8	Hs.502378	0.626618
215913_s_at	GULP1	Hs.470887	1.86139		210172_at	SF1	Hs.502829	0.570019
215707_s_at	PRNP	Hs.472010	1.90409		210656_at	EED	Hs.503510	0.627493
209590_at	BMP7	Hs.473163	1.74289		209074_s_at	FAM107A	Hs.506357	0.631361
201250_s_at	SLC2A1	Hs.473721	2.14406		214748_at	N4BP2L2	Hs.507680	0.611963
219569_s_at	TMEM22	Hs.477692	1.76965		235412_at	ARHGEF7	Hs.508738	0.419
226570_at	ATP1B3	Hs.477789	1.58376		226492_at	SEMA6D	Hs.511265	0.543292
228881_at	PARL	Hs.478469	1.61511		235925_at	TCF12	Hs.511504	0.621112
210233_at	IL1RAP	Hs.478673	2.08072		235023_at	VPS13C	Hs.511668	0.613541
228010_at	PPP2R2C	Hs.479069	1.78179		207522_s_at	ATP2A3	Hs.513870	0.548052
214244_s_at	ATP6V0E1	Hs.484188	1.58816		1554595_at	SYMPK	Hs.515475	0.659778
204187_at	GMPR	Hs.484741	1.71136		214693_x_at	NBPF10	Hs.515947	0.599922
217230_at	EZR	Hs.487027	1.61982		232180_at	UGP2	Hs.516217	0.643428
236224_at	RIT1	Hs.491234	2.21294		215591_at	SATB2	Hs.516617	0.566249
210733_at	TRAM1	Hs.491988	1.64116		201085_s_at	SON	Hs.517262	0.610841
230618_s_at	BAT2L2	Hs.494614	1.5168		240383_at	UBE2D3	Hs.518773	0.627817
201442_s_at	ATP6AP2	Hs.495960	1.56614		232865_at	AFF4	Hs.519313	0.650689
216100_s_at	TOR1AIP1	Hs.496459	1.51041		227183_at	LOC728264	Hs.519666	0.631168
235016_at	REEP3	Hs.499833	1.80679		212177_at	SFRS18	Hs.520287	0.49145
228610_at	TM9SF3	Hs.500674	1.6644		227062_at	NEAT1	Hs.523789	0.400693
226829_at	AFAP1L2	Hs.501106	1.85372		235213_at	ITPKB	Hs.528087	0.655608
208456_s_at	RRAS2	Hs.502004	1.84465		240452_at	GSPT1	Hs.528780	0.653191
235056_at	ETV6	Hs.504765	1.5819		202379_s_at	NKTR	Hs.529509	0.567341
235026_at	C12orf66	Hs.505871	1.61637		236816_at	NAA25	Hs.530941	0.63265
208025_s_at	HMGA2	Hs.505924	2.72173		1557081_at	RBM25	Hs.531106	0.614807
219901_at	FGD6	Hs.506381	1.58589		228613_at	RAB11FIP3	Hs.531642	0.663129
205466_s_at	HS3ST1	Hs.507348	1.79252		208859_s_at	ATRX	Hs.533526	0.594553
222556_at	ALG5	Hs.507769	1.56108		204359_at	FLRT2	Hs.533710	0.606368
228193_s_at	C13orf15	Hs.507866	1.54852		221989_at	RPL10	Hs.534404	0.663943
229026_at	CDC42SE2	Hs.508829	1.65696		225594_at	CREBZF	Hs.535319	0.626899
207156_at	HIST1H2AG	Hs.51011	2.0912		214723_x_at	ANKRD36	Hs.541894	0.621414
1568126_at	ANXA2	Hs.511605	1.76175		239771_at	CAND1	Hs.546407	0.545314
231771_at	GJB6	Hs.511757	3.61916		1556821_x_at	DLEU2	Hs.547964	0.652238
235433_at	APOOL	Hs.512181	1.51025		1557987_at	LOC641298	Hs.552700	0.62475
207039_at	CDKN2A	Hs.512599	3.41436		226587_at	SNRPN	Hs.555970	0.490266
205048_s_at	PSPH	Hs.512656	1.95944		210479_s_at	RORA	Hs.560343	0.596186
213655_at	YWHAE	Hs.513851	1.51365		242578_x_at	SLC22A3	Hs.567337	0.632722
1552664_at	FLCN	Hs.513975	1.67175		212847_at	FUBP1	Hs.567380	0.615588
1555826_at	EPR1	Hs.514527	1.52496		217591_at	SKIL	Hs.581632	0.666151
222698_s_at	IMPACT	Hs.515317	1.51982		232090_at	LOC100128178	Hs.584880	0.58725
226014_at	EIF3F	Hs.516023	1.60065		1569652_at	MLLT3	Hs.591085	0.644858
209676_at	TFPI	Hs.516578	2.15167		212007_at	UBXN4	Hs.591242	0.619351
228966_at	PANK2	Hs.516859	1.64029		230110_at	MCOLN2	Hs.591446	0.480444
227669_at	BRP44	Hs.517768	1.63346		229586_at	CHD9	Hs.59159	0.658567
221871_s_at	TFG	Hs.518123	1.71502		206169_x_at	ZC3H7B	Hs.592188	0.599748
228746_s_at	CDV3	Hs.518265	1.582		217497_at	TYMP	Hs.592212	0.625595
1552660_a_at	C5orf22	Hs.519246	1.69594		223646_s_at	CYorf15B	Hs.592254	0.365211
213875_x_at	C6orf62	Hs.519930	1.70979		223190_s_at	MLL5	Hs.592262	0.649498
1553338_at	C1orf55	Hs.520192	1.83352		205976_at	FASTKD2	Hs.5930	0.659529
229067_at	SRGAP2P1	Hs.523529	1.94537		216092_s_at	SLC7A8	Hs.596643	0.635291
224444_s_at	C1orf97	Hs.523932	1.62215		1559731_x_at	MACROD1	Hs.602898	0.591147
223278_at	GJB2	Hs.524894	1.69177		214295_at	KIAA0485	Hs.604754	0.648635
232176_at	SLITRK6	Hs.525105	2.13556		81737_at	NPIPL3	Hs.611072	0.628413
214182_at	ARF6	Hs.525330	1.77213		225191_at	CIRBP	Hs.618145	0.623457
218872_at	TESC	Hs.525709	1.74129		1558678_s_at	MALAT1	Hs.621695	0.448472
220608_s_at	ZNF770	Hs.5327	1.56689		203185_at	RASSF2	Hs.631504	0.657915
208229_at	FGFR2	Hs.533683	1.55394		232215_x_at	PRR11	Hs.631750	0.649542
208527_x_at	HIST1H2BE	Hs.534369	1.75352		214035_x_at	LOC399491	Hs.634612	0.637534
221222_s_at	C1orf56	Hs.549171	1.82371		221501_x_at	LOC339047	Hs.634612	0.63515
239078_at	C1orf58	Hs.552608	1.87694		210282_at	ZMYM2	Hs.644041	0.633661
208523_x_at	HIST1H2BI	Hs.553506	1.68551		209290_s_at	NFIB	Hs.644095	0.628664
227253_at	CP	Hs.558314	1.53382		233595_at	USP34	Hs.644708	0.592465
223839_s_at	SCD	Hs.558396	2.07497		229115_at	DYNC1H1	Hs.649497	0.657821
1558930_at	LOC728192	Hs.559194	2.94181		243835_at	ZDHHC21	Hs.649522	0.557134
235191_at	LOC148189	Hs.565253	1.85951		232360_at	EHF	Hs.653859	0.6068
220106_at	NPC1L1	Hs.567486	1.81532		206059_at	ZNF91	Hs.654471	0.608593
229713_at	PIP4K2A	Hs.57079	1.50909		201621_at	NBL1	Hs.654502	0.661024
235299_at	SLC41A2	Hs.577463	1.5358		212587_s_at	PTPRC	Hs.654514	0.498366
230831_at	FRMD5	Hs.578544	1.73932		238449_at	LOC595101	Hs.654650	0.645286
219927_at	FCF1	Hs.579828	1.68804		222357_at	ZBTB20	Hs.655108	0.596985
202686_s_at	AXL	Hs.590970	1.85968		233599_at	hCG_2003663	Hs.655858	0.637738
235354_s_at	RSRC1	Hs.591283	1.83363		219848_s_at	ZNF432	Hs.655934	0.648843
232283_at	LYSMD1	Hs.591482	1.81253		214715_x_at	ZNF160	Hs.655967	0.646906
242988_at	DCST2	Hs.591491	1.50575		208109_s_at	C15orf5	Hs.656938	0.603653
227605_at	AIMP1	Hs.591680	1.54817		232138_at	MBNL2	Hs.657347	0.65168
232035_at	HIST1H4H	Hs.591790	1.74114		1553186_x_at	RASEF	Hs.657750	0.570872
209911_x_at	HIST1H2BD	Hs.591797	1.6297		230505_at	LOC145474	Hs.658241	0.56768
215779_s_at	HIST1H2BG	Hs.591809	1.52004		221143_at	RPA4	Hs.659349	0.647639
221618_s_at	TAF9B	Hs.592248	1.80341		213089_at	LOC100272216	Hs.662074	0.543287
218498_s_at	ERO1L	Hs.592304	1.64118		1560199_x_at	LOC728153	Hs.664739	0.616491
1552627_a_at	ARHGAP5	Hs.592313	1.52461		232568_at	MGC24103	Hs.664877	0.488203
219929_s_at	ZFYVE21	Hs.592322	1.5733		204538_x_at	NPIP	Hs.676266	0.650145
202533_s_at	DHFR	Hs.592364	1.5914		229272_at	FNBP4	Hs.6834	0.647673
214073_at	CTTN	Hs.596164	1.56365		215318_at	CG012	Hs.687692	0.615011
213868_s_at	DHRS7	Hs.59719	1.63289		228030_at	RBM6	Hs.696735	0.540569
230869_at	FAM155A	Hs.598102	3.01297		228592_at	MS4A1	Hs.712553	0.368738
1566764_at	MACC1	Hs.598388	2.44419		237475_x_at	CCDC152	Hs.718521	0.613718
232752_at	LOC100287616	Hs.599785	1.68304		228990_at	SNHG12	Hs.718565	0.595318
217997_at	PHLDA1	Hs.602085	1.51163		210425_x_at	GOLGA8B	Hs.720151	0.618235
216884_at	PTPN12	Hs.61812	1.53629		244631_at	LOC389834	Hs.720653	0.568862
211506_s_at	IL8	Hs.624	1.81592		226062_x_at	FAM63A	Hs.723127	0.666058
228196_s_at	LARP4B	Hs.631814	1.52609		204039_at	CEBPA	Hs.76171	0.654755
1555731_a_at	AP1S3	Hs.632555	2.1046		230543_at	USP9X	Hs.77578	0.530978
202091_at	ARL2BP	Hs.632873	1.55183		232304_at	PELI1	Hs.7886	0.632889
231227_at	WNT5A	Hs.643085	1.76999		1558747_at	SMCHD1	Hs.8118	0.647609
229216_s_at	CSNK2A1	Hs.644056	1.55604		214059_at	IFI44	Hs.82316	0.57586
227919_at	UCA1	Hs.644234	1.77133		230516_at	C7orf30	Hs.87385	0.549568
215774_s_at	SUCLG2	Hs.644919	1.71939		209655_s_at	TMEM47	Hs.8769	0.580807
210115_at	RPL39L	Hs.647900	1.67489		206209_s_at	CA4	Hs.89485	0.346561
230793_at	LRRC16A	Hs.649550	2.17396		232169_x_at	NDUFS8	Hs.90443	0.662754
229689_s_at	DLG5	Hs.652690	1.5941
207723_s_at	KLRC3	Hs.654362	1.5858
228491_at	KRT19	Hs.654568	1.77672
205796_at	TCP11L1	Hs.655341	1.63748
229927_at	LEMD1	Hs.655520	3.12802
222680_s_at	DTL	Hs.656473	1.51062
238542_at	ULBP2	Hs.656778	1.96298
212963_at	TM2D1	Hs.656790	1.62844
236430_at	TMED6	Hs.658619	1.66686
214455_at	HIST1H2BC	Hs.658713	1.98382
228564_at	LOC375295	Hs.659070	2.02648
235911_at	LOC440995	Hs.662242	2.06038
1554332_a_at	hCG_2018279	Hs.671273	1.88258
214639_s_at	HOXA1	Hs.67397	1.7152
208844_at	VDAC3	Hs.699301	1.89602
216493_s_at	IGF2BP3	Hs.700696	1.50332
226634_at	METTL10	Hs.706064	1.50122
227636_at	THAP5	Hs.707689	1.56241
229835_s_at	SLMO2	Hs.712756	1.68273
213562_s_at	SQLE	Hs.71465	1.6401
203437_at	TMEM11	Hs.719186	1.85606
225521_at	ANAPC7	Hs.719935	1.51569
222614_at	RWDD2B	Hs.723298	1.79852
228421_s_at	EFEMP1	Hs.76224	1.53111
212224_at	ALDH1A1	Hs.76392	1.64935
209398_at	HIST1H1C	Hs.7644	1.67682
217383_at	PGK1	Hs.78771	1.8723
213172_at	TTC9	Hs.79170	1.71667
204733_at	KLK6	Hs.79361	3.41886
238562_at	UTP23	Hs.86970	1.61856
213954_at	FAM169A	Hs.91662	1.62323
224463_s_at	C11orf70	Hs.98328	2.62835
